# Supplementary material
Source: PubMed Central journal article supplement (PMC4198480)
Supplement: NIHMS544726-supplement-Supp_Fig_S1.pdf [file NIHMS544726-supplement-Supp_Fig_S1.pdf]

# Supporting Information

## *Sub-second Proton Imaging of $^{13}\text{C}$ Hyperpolarized Contrast Agents in Water*

Milton L. Truong,<sup>a</sup> Aaron M. Coffey,<sup>a,b</sup> Roman V. Shchepin,<sup>a</sup> Kevin W. Waddell<sup>a,c</sup> and Eduard  
Y. Chekmenev<sup>\*,a,b,d,e</sup>

<sup>a</sup>Department of Radiology, Vanderbilt University Institute of Imaging Science (VUIIS),  
Nashville, Tennessee, 37232, United States

<sup>b</sup>Department of Biomedical Engineering, Vanderbilt University, Nashville, Tennessee, 37235,  
United States

<sup>c</sup>Department of Physics, Vanderbilt University, Nashville, Tennessee, 37235, United States

<sup>d</sup>Department of Biochemistry, Vanderbilt University, Nashville, Tennessee, 37205, United States

<sup>e</sup>Vanderbilt-Ingram Cancer Center, Vanderbilt University, Nashville, Tennessee, 37232, United  
States

KEYWORDS: NMR; Hyperpolarization; Contrast Agent; sub-second imaging;  $^{13}\text{C}$ ; indirect  
detection; parahydrogen; PHIP

\*For E.Y.C.: phone, +1-615-322-1329; fax, +1-626-322-0734; e-mail,

[eduard.chekmenev@vanderbilt.edu](mailto:eduard.chekmenev@vanderbilt.edu)

### 3.1. Heteronuclear Polarization From Three Methyl Protons to $^{13}\text{C}$ in Isolated Methyl Group, Sodium 1- $^{13}\text{C}$ -Acetate Phantom in $\text{D}_2\text{O}$ : Imaging and Spectroscopy

Polarization transfer from  $^{13}\text{C}$  spin storage with long  $T_1$  to protons was tested and optimized using sodium 1- $^{13}\text{C}$ -acetate in 99.8%  $\text{D}_2\text{O}$ .  $^1\text{H}$  polarization was transferred from three methyl protons of acetate using an INEPT transfer block to enhance polarization of the 1- $^{13}\text{C}$  site of acetate. This  $^{13}\text{C}$  pre-polarization step was useful, because it increases the overall experimental sensitivity and reduces repetition time between experiments due to  $^1\text{H } T_1 \ll ^{13}\text{C } T_1$ . Methyl protons served as a source of polarization and therefore experiments were repeated every 10 seconds versus minutes, because acetate's long  $^{13}\text{C}_1 T_1$  relaxation period can be avoided. Furthermore, these experiments with INEPT preparation step to increase  $^{13}\text{C}$  polarization above thermal equilibrium conveniently simulate the non-equilibrium polarization enhancements achieved via hyperpolarization.

For sodium 1- $^{13}\text{C}$ -acetate,  $^{13}\text{C}$  polarization transfer from methyl protons using the refocused INEPT sequence, Fig. 1, can be expressed analytically according the following equation:

$$P_{13\text{C}} = 3 \cdot \sin(2\pi J_{\text{HC}}\tau_{\text{INEPT}}) \cdot \sin(2\pi J_{\text{HC}}\tau_{\text{refocus}}) \cdot \cos^2(2\pi J_{\text{HC}}\tau_{\text{refocus}}) \cdot P_{1\text{H}}, \quad (1)$$

where  $P_{13\text{C}}$  refers to  $^{13}\text{C}$  polarization and  $J_{\text{HC}}$  to the two-bond heteronuclear spin-spin coupling between 1- $^{13}\text{C}$  and the methyl protons ( $J_{\text{HC}} = 6.0$  Hz). The factor of 3 accounts for coherence transfer from three protons of the methyl group to one  $^{13}\text{C}$ . The first sin term represents INEPT evolution and the second sin and  $\cos^2$  terms represent evolution during refocusing. The INEPT part of the equation is maximized when  $\tau_{\text{INEPT}} = 1/(4J_{\text{HC}})$ , while the refocus part is maximal at

$\tau_{refocus} \sim 1/(10J_{HC})$ . Theoretically, if the polarization from all three methyl protons were fully refocused, i. e.  $\sin(2\pi J_{HC}\tau_{refocus}) \cdot \cos^2(2\pi J_{HC}\tau_{refocus}) = 1$  (Eq. 1), then the enhancement factor would be 3, however, this is not the case, because this term has a maximum  $< 1$ , and therefore, the maximum theoretical enhancement is significantly less. When 42 ms and 16 ms respective delays were used for  $\tau_{INEPT}$  and  $\tau_{refocus}$ ,  $P_{13C}^{INEPT} = 1.15 \cdot P_{1H}$ , providing the largest  $^1H \rightarrow ^{13}C$  polarization transfer when compared to the signal from  $^{13}C$  Boltzmann polarization, Fig. 1. The equilibrium  $P_{1H}$  is 3.9772 times greater than equilibrium of  $P_{13C}$ , or  $P_{1H} = 3.9772 \cdot P_{13C}$ , resulting in  $P_{13C}^{INEPT} = 1.15 \cdot 3.9772 \cdot P_{13C} = 4.59 \cdot P_{13C}$ , where 4.59 is the theoretical enhancement,  $\epsilon$ .

### *3.2. <sup>1</sup>H Background Suppression Using Multiband RF Excitation Pulses and <sup>1</sup>H Pre-saturation: Imaging and Spectroscopy*

With refocused INEPT optimized as a pre-polarization sequence for <sup>13</sup>C, a second INEPT pulse sequence block was then utilized to transfer polarization from <sup>13</sup>C to the contrast agent's protons. In aqueous solutions, a proton presaturation pulse alone, placed prior to <sup>13</sup>C magnetization transfer, was found to be ineffective for suppressing water. Frequency selective RF pulses provide an elegant solution to further minimize water <sup>1</sup>H background signal, because they excite a specific frequency range while ignoring extraneous regions. The excitation bandwidth for a typical 90° rectangular hard pulse can be defined as  $1/t_p$ , where  $t_p$  is the duration of the pulse. In examining protons with a typical spectral width of 12 ppm or 2.4 kHz at 4.7 T, a 90° hard pulse with  $t_p = 50 \mu\text{s}$  has an excitation bandwidth of 20 kHz, which exceeds the needed bandwidth by almost eight folds. Moreover, an RF pulse with such a large excitation bandwidth has almost no spectral selectivity. A potential solution to achieve spectral excitation selectivity when using square RF pulse is (i) to decrease  $1/t_p$  by reducing RF power and (ii) to apply frequency offset so that only non-water spins are excited. However, a hard pulse excitation profile in frequency domain is described by a sinc function,  $\sin(x)/x$ , where the maximum amplitude is located at the center of the pulse, with noticeable oscillations similar to an FID. These oscillations are problematic even at reduced excitation bandwidth, because they can excite water <sup>1</sup>H resonance. The water excitation would still occur resulting in significant water <sup>1</sup>H background signal.

A Gaussian shaped RF pulse provides a suitable alternative to a hard pulse since its excitation profile in the frequency domain is also symmetrical, and it does not display the oscillations observed in the hard pulse, and decays quickly to zero. As a result, it enables

exciting primarily proton(s) of interest in the contrast agent, while having minimal to no excitation of water  $^1\text{H}$  resonance. Since excitation pulses can potentially offer another excitation selectivity method.

## Water Background Suppression and Frequency Selective Excitation Pulse

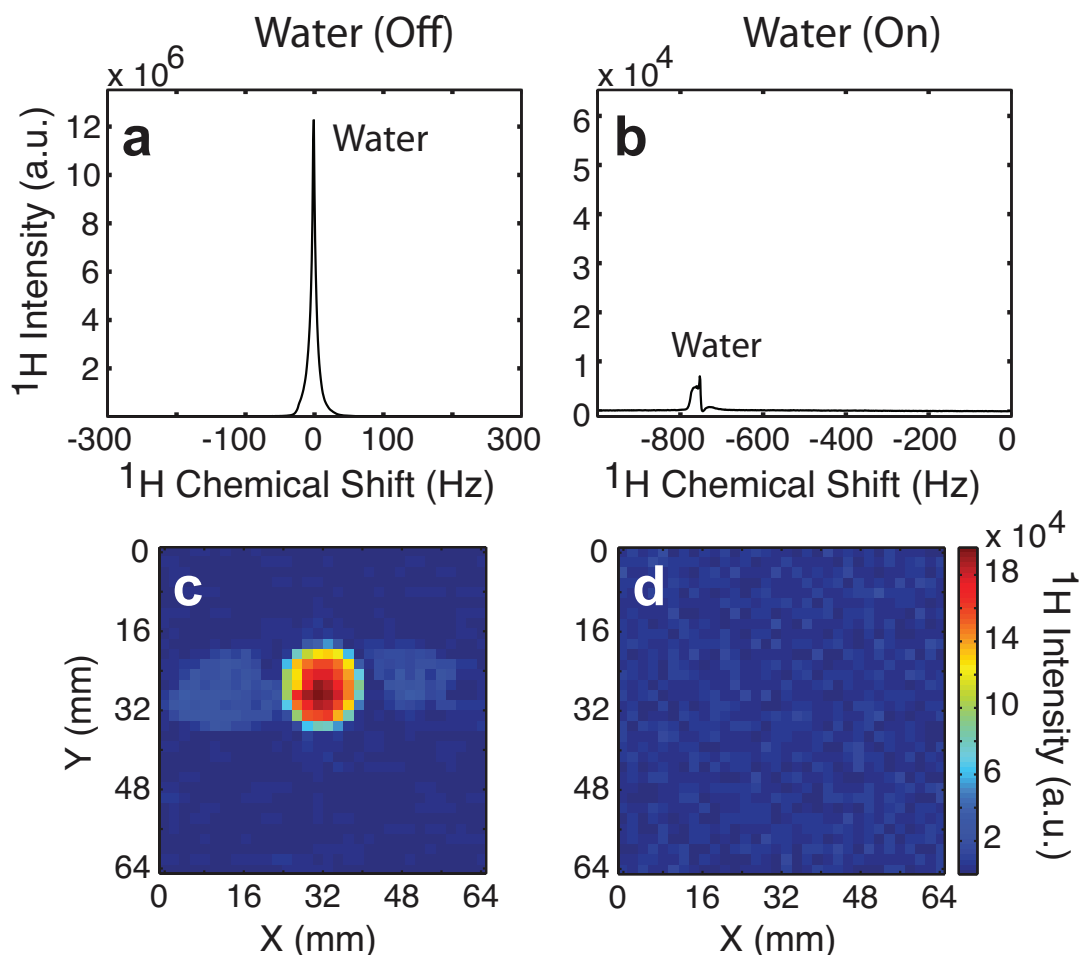

**Figure S1. Water Background Suppression.** Single scan proton spectroscopic and imaging detection of a 2.8 mL water phantom, without (a and c) and with (b and d) water suppression. Suppression was observed for the water signal. The water FSSFP images were acquired using  $\text{TR} = 5.95$  ms,  $\text{TE} = 2.97$  ms,  $\text{FOV} = 64 \times 64$  mm $^2$ , and an in-plane resolution of  $2 \times 2$  mm $^2$ .
